# Supplementary material for: Genetic Ablation of STE20-Type Kinase MST4 Does Not Alleviate Diet-Induced MASLD Susceptibility in Mice
Source: MDPI journal article supplement (doi:10.3390/ijms25042446), 2024-02-19
Supplement: s1 [file s1]

**Supplementary Figure S1**

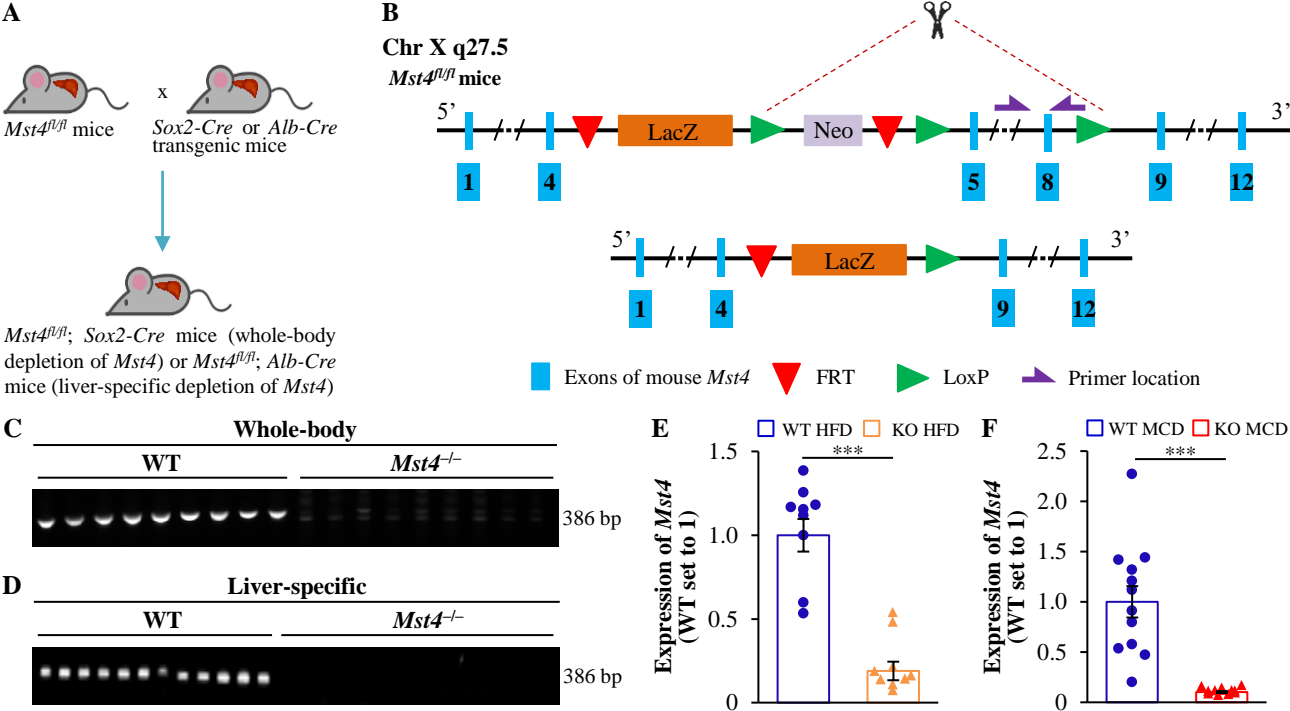

**Supplementary Figure S1.** Generation and genotyping of whole-body or liver-specific *Mst4* knockout mice. (A-B) Schematic diagram depicting the generation of *Mst4* whole-body or liver-specific knockout mice by crossing *Mst4* floxed (*Mst4<sup>fl/fl</sup>*) mice with *Sox2-Cre* or *Alb-Cre* mice, respectively. (C-D) Agarose gel electrophoresis of SYBR safe-stained PCR products from the liver tissue of the whole-body (C) and liver-specific (D) *Mst4<sup>-/-</sup>* mice and their wild-type littermates using primers shown in (B). (E-F) Relative *Mst4* mRNA expression was assessed by qRT-PCR in the liver tissue of the whole-body (E) and liver-specific (F) *Mst4<sup>-/-</sup>* mice and their wild-type littermates. Data are mean  $\pm$  SEM from 9-12 mice per group. KO, knockout; WT, wild-type. \*\*\* $P<0.001$

Supplementary Figure S2

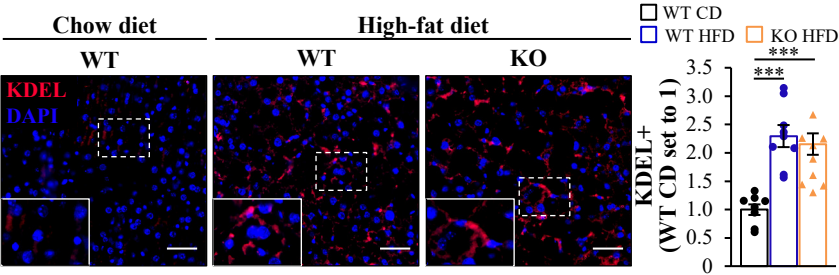

**Supplementary Figure S2.** Whole-body ablation of MST4 has no effect on the abundance of ER stress marker KDEL in obese mice. Representative liver sections were processed for immunofluorescence with anti-KDEL (red) antibodies; nuclei stained with DAPI (blue). The scale bars represent 25 μm. Quantification of the staining. Data are mean ± SEM from 8-9 mice per group. CD, chow diet; HFD, high-fat diet; KO, knockout; WT, wild-type. \*\*\* $P < 0.001$

**Supplementary Figure S3**

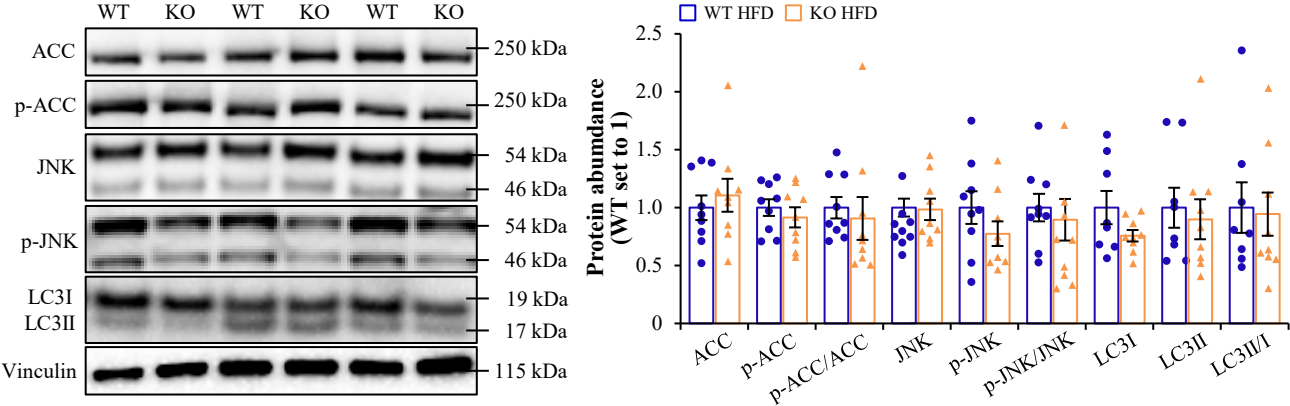

**Supplementary Figure S3.** Hepatic ACC, JNK, and LC3 signaling is unaffected in high-fat diet-fed *Mst4*<sup>-/-</sup> mice. Liver lysates were analyzed by Western blot using antibodies specific for ACC, phospho-ACC (Ser<sup>79</sup>), JNK, phospho-JNK (Thr<sup>183</sup>/Tyr<sup>185</sup>), or LC3. Protein levels were measured by densitometry; representative Western blots are shown with vinculin used as a loading control. Data are mean ± SEM from 8-9 mice per group. KO, knockout; WT, wild-type

Supplementary Figure S4

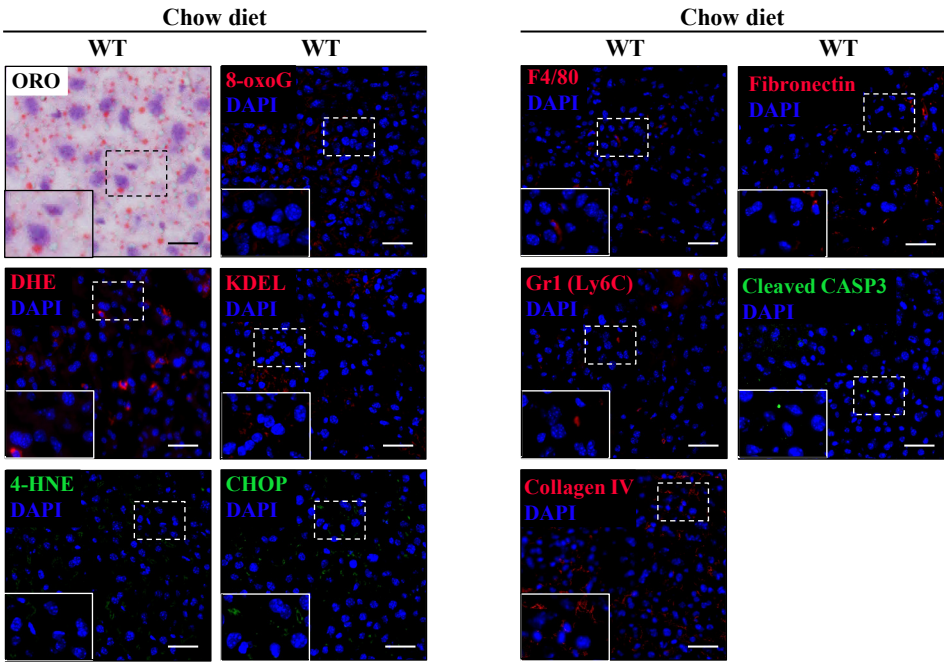

**Supplementary Figure S4.** Representative liver sections from chow diet-fed wild-type mice were stained with Oil Red O or DHE (red) or processed for immunofluorescence with anti-4-HNE (green), anti-8-oxoG (red), anti-KDEL (red), anti-CHOP (green), anti-F4/80, anti-Gr1 (Ly6C), anti-collagen IV, anti-fibronectin (red), or anti-cleaved CASP3 (green) antibodies; nuclei stained with DAPI (blue). The scale bars represent 25  $\mu$ m. ORO, Oil Red O; WT, wild-type

**Supplementary Figure S5**

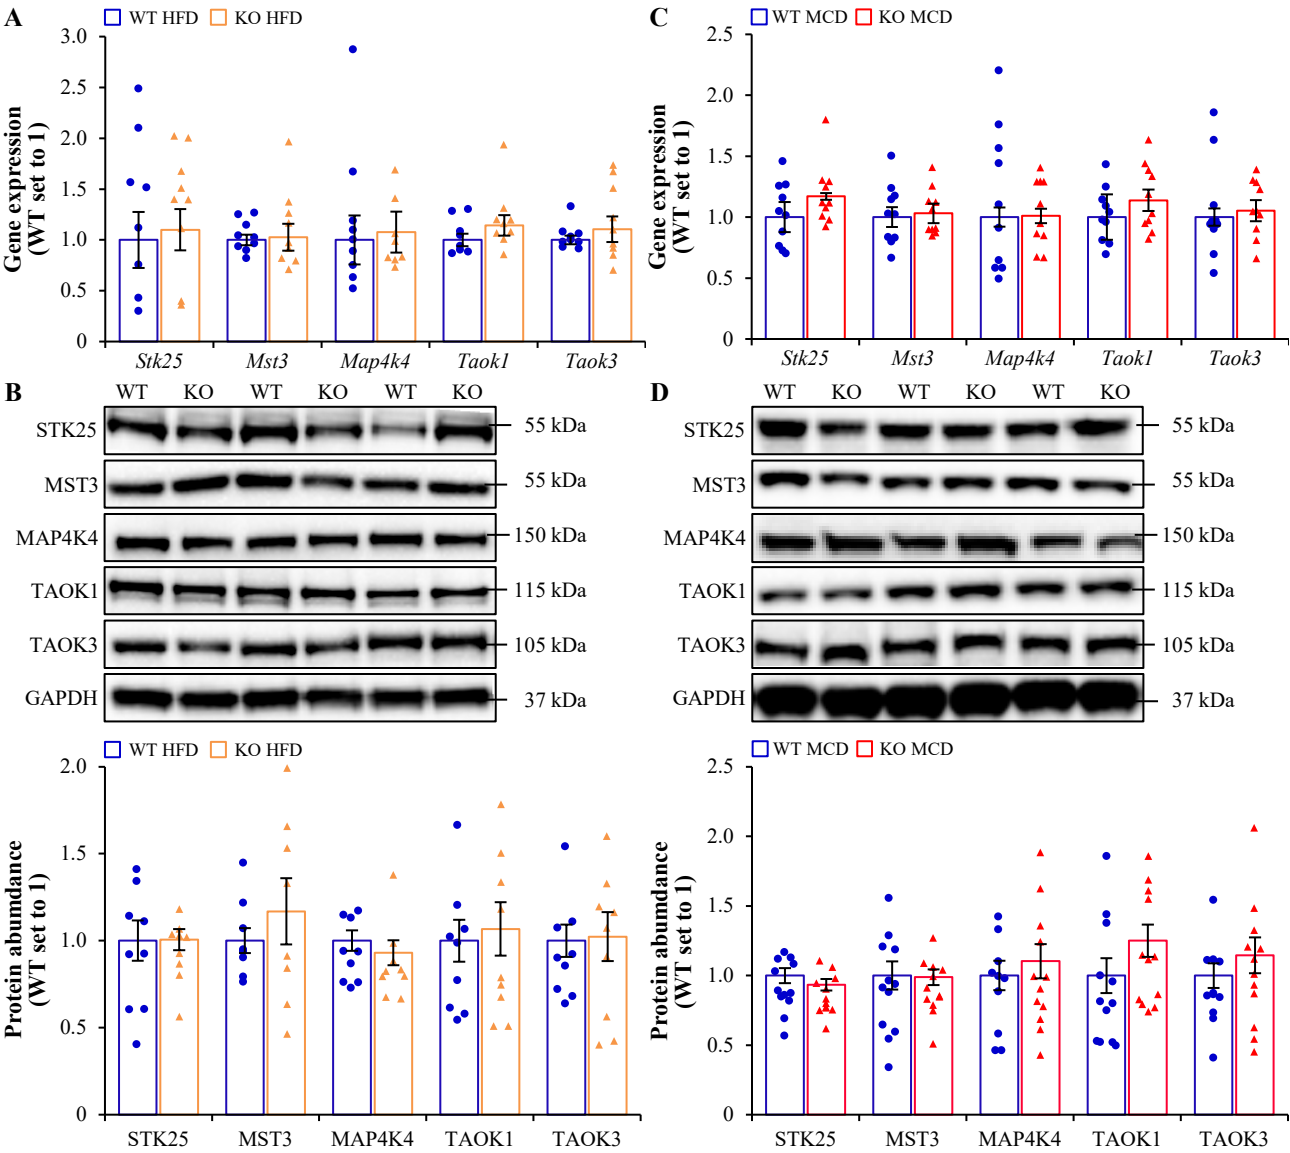

**Supplementary Figure S5.** Genetic loss of MST4 does not affect the hepatic expression of related STE20-type kinases. (A-D) Relative mRNA (A, C) and protein (B, D) abundance of selected STE20 kinases was assessed by qRT-PCR and Western blot, respectively, in the liver tissue of the whole-body (A-B) and liver-specific (C-D) *Mst4*<sup>-/-</sup> mice and their wild-type littermates. (B, D) Liver lysates were analyzed by Western blot using antibodies specific for STK25, MST3, MAP4K4, TAOK1, or TAOK3. Protein levels were measured by densitometry; representative Western blots are shown with glyceraldehyde-3-phosphate dehydrogenase (GAPDH) used as a loading control. Data are mean ± SEM from 8-9 mice per group. KO, knockout; WT, wild-type

**Supplementary Table S1.** List of antibodies used for immunofluorescence/immunohistochemistry and Western blot analysis.

| Type             | Antibody name and catalog number                | Working dilution | Company                                   |
|------------------|-------------------------------------------------|------------------|-------------------------------------------|
| Primary antibody | anti-Cytochrome c (MA5-11674)                   | 1:500            | Invitrogen (Waltham, MA)                  |
|                  | anti-CHOP (MA1-250)                             | 1:200            | Invitrogen                                |
|                  | anti-ACC (#3662)                                | 1:1000           | Cell Signaling Technology (Boston, MA)    |
|                  | anti-p-ACC (#3661)                              | 1:1000           | Cell Signaling Technology                 |
|                  | anti-JNK1/2 (#9252)                             | 1:1000           | Cell Signaling Technology                 |
|                  | anti-p-JNK1/2 (#4668)                           | 1:1000           | Cell Signaling Technology                 |
|                  | anti-LC3 (#2775)                                | 1:1000           | Cell Signaling Technology                 |
|                  | anti-vinculin (sc-7269)                         | 1:500            | Santa Cruz Biotechnology (Santa Cruz, CA) |
|                  | anti-TH (NB300-109)                             | 1:500            | Novus Biologicals (Centennial, CO)        |
|                  | anti-UCP1 (ab10983)                             | 1:500            | Abcam (Cambridge, UK)                     |
|                  | anti-total OXPHOS antibody cocktail* (ab110413) | 1:2000           | Abcam                                     |
|                  | anti-4-HNE (ab46545)                            | 1:500            | Abcam                                     |
|                  | anti-8-oxoG (ab62623)                           | 1:500            | Abcam                                     |
|                  | anti-KDEL (ab176333)                            | 1:500            | Abcam                                     |
|                  | anti-F4/80 (MCA497GA)                           | 1:250            | Bio-Rad (Hercules, CA)                    |
|                  | anti-Gr1 (Ly6C) (ab15627)                       | 1:300            | Abcam                                     |
|                  | anti-Collagen IV (NB120-6586)                   | 1:500            | Novus Biologicals                         |
|                  | anti-Fibronectin (F3648)                        | 1:300            | Sigma-Aldrich (St. Louis, MO)             |
|                  | anti-Cleaved CASP3 (ab49822)                    | 1:500            | Abcam                                     |
|                  | anti- $\alpha$ SMA (ab5694)                     | 1:200            | Abcam                                     |
|                  | anti-STK25 (25821-1-AP)                         | 1:750            | Proteintech (Chicago, IL)                 |
|                  | anti-MST3 (#3723)                               | 1:1000           | Cell Signaling Technology                 |
|                  | anti-MAP4K4 (PA5-104232)                        | 1:500            | Invitrogen                                |
|                  | anti-TAOK1 (26250-1-AP)                         | 1:750            | Proteintech                               |
|                  | anti-TAOK3 (28403-1-AP)                         | 1:500            | Proteintech                               |
|                  | anti-GAPDH (#2118)                              | 1:1000           | Cell Signaling Technology                 |

\*This product is an optimized premixed cocktail which contains 5 mouse antibodies, one each against NDUF8 (ab110242), SDHB (ab14714), UQCRC2 (ab14745), MTCO1 (ab14705), and ATP5A (ab14748).

| <b>Type</b>        | <b>Antibody name and catalog number</b>          | <b>Working dilution</b> | <b>Company</b>            |
|--------------------|--------------------------------------------------|-------------------------|---------------------------|
| Secondary antibody | Alexa Fluor-594-labeled anti-rat IgG (A11007)    | 1:500                   | Invitrogen                |
|                    | Alexa Fluor-594-labeled anti-rabbit IgG (A21207) | 1:500                   | Invitrogen                |
|                    | Alexa Fluor-594-labeled anti-mouse IgG (A11005)  | 1:500                   | Invitrogen                |
|                    | anti-rabbit IgG (#7074)                          | 1:1000                  | Cell Signaling Technology |
|                    | anti-mouse IgG (#7076)                           | 1:1000                  | Cell Signaling Technology |
|                    | anti-rabbit IgG (E0432)                          | 1:300                   | Dako (Glostrup, DK)       |
|                    |                                                  |                         |                           |

**Supplementary Table S2.** Adipose tissue depots and liver weights were estimated in absolute values, and related to total body weight, in high-fat diet-fed *Mst4*<sup>-/-</sup> and wild-type mice.

| Parameter             | WT HFD      | KO HFD      |
|-----------------------|-------------|-------------|
| eWAT (g)              | 0.43 ± 0.03 | 0.47 ± 0.03 |
| eWAT (% body weight)  | 0.95 ± 0.04 | 1.08 ± 0.06 |
| sWAT (g)              | 0.61 ± 0.19 | 0.46 ± 0.05 |
| sWAT (% body weight)  | 1.61 ± 0.81 | 1.02 ± 0.09 |
| Liver (g)             | 2.20 ± 0.27 | 2.06 ± 0.24 |
| Liver (% body weight) | 4.75 ± 0.45 | 4.57 ± 0.35 |

Data are mean ± SEM from 9 mice per group. HFD, high-fat diet; KO, knockout; WT, wild-type
